# Supplementary material for: Cancer-associated fibroblast classification in single-cell and spatial proteomics data
Source: PubMed Central journal article supplement (PMC10354071; doi:10.1038/s41467-023-39762-1), 2023-07-18
Supplement: 41467_2023_39762_MOESM1_ESM.pdf [file 41467_2023_39762_MOESM1_ESM.pdf]

**a**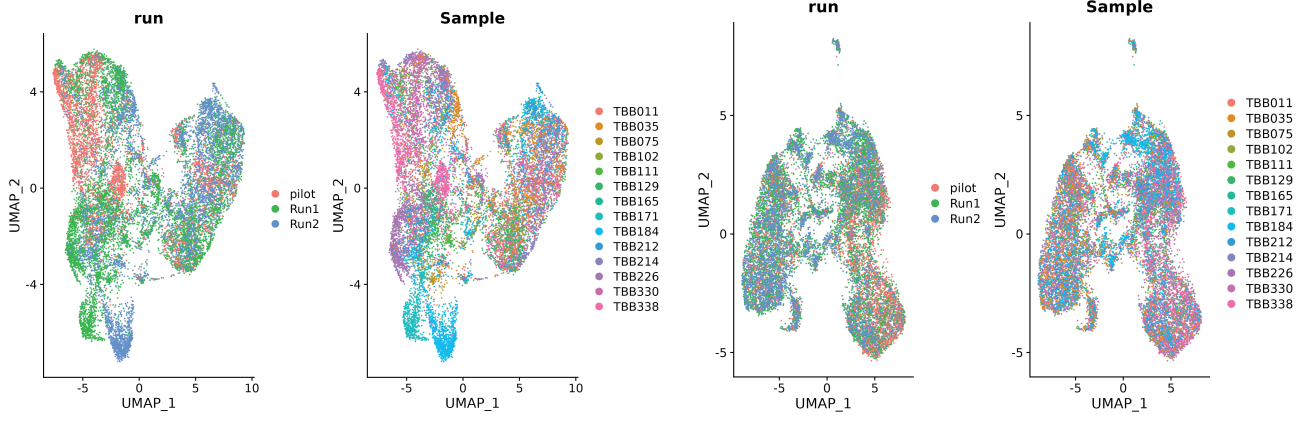**b**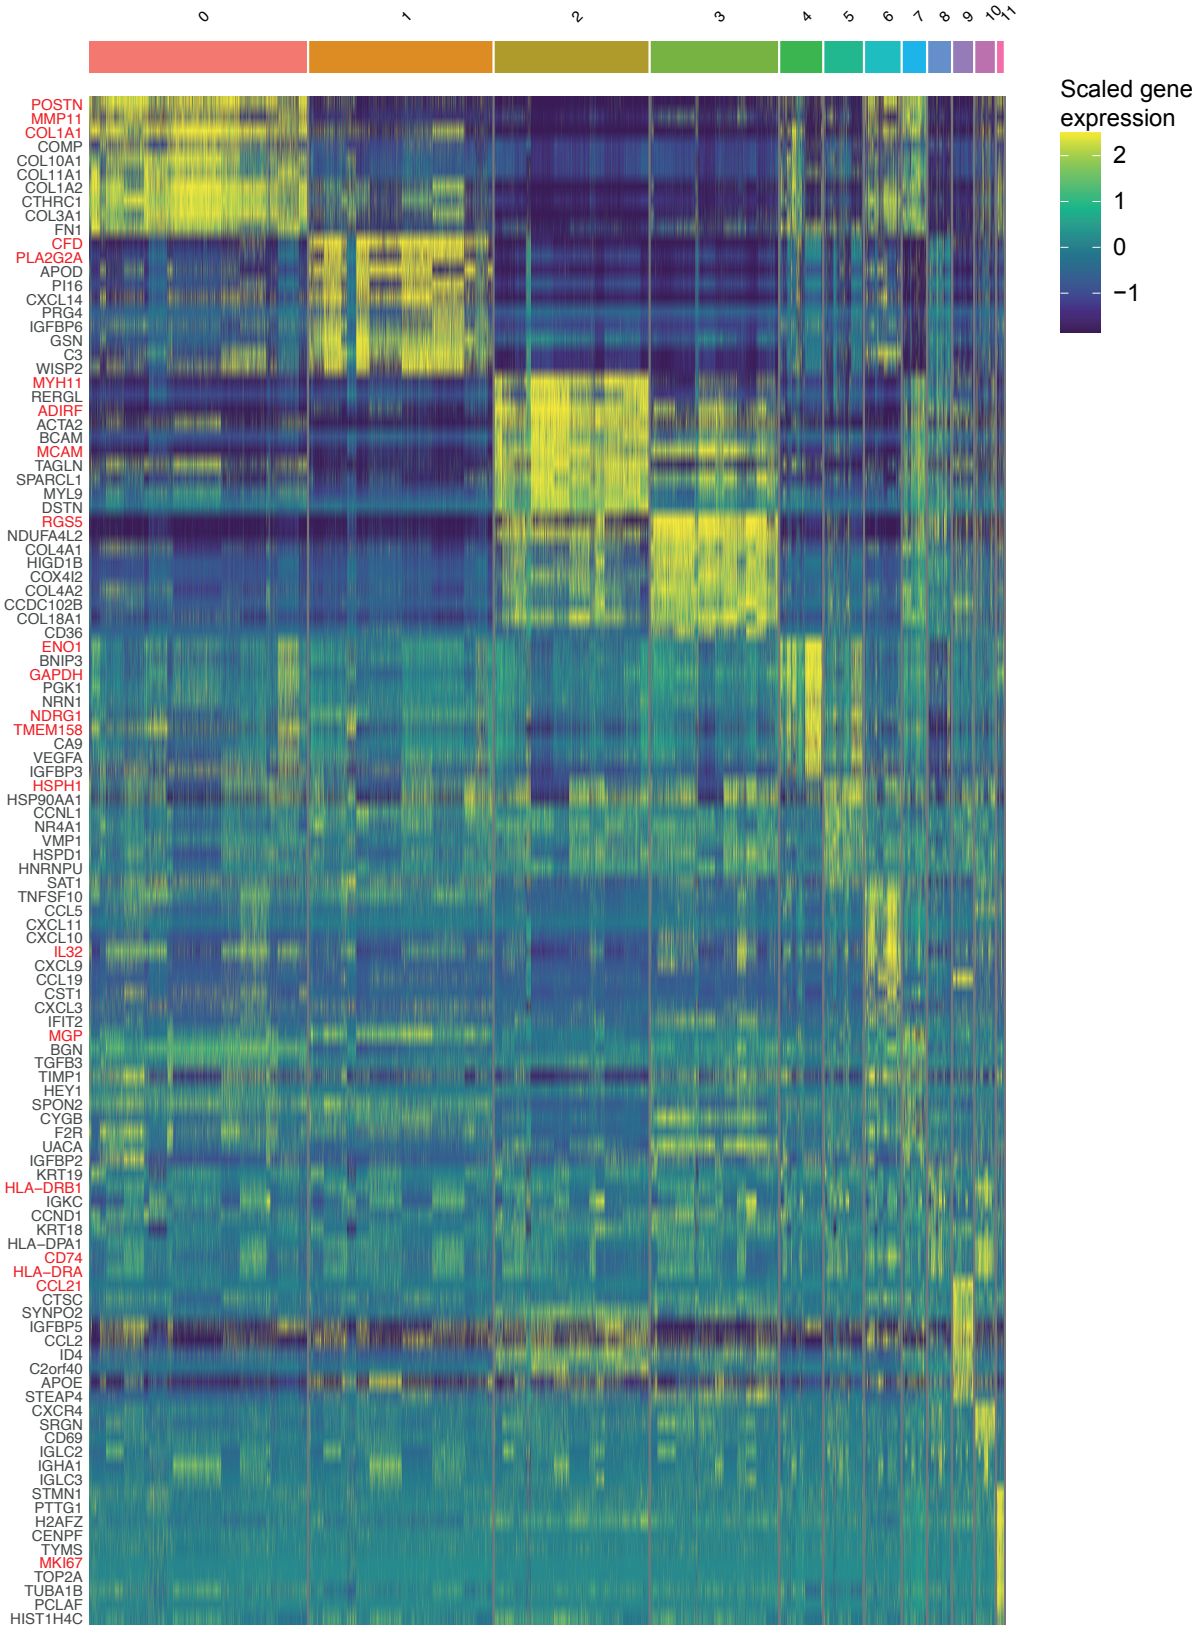

c

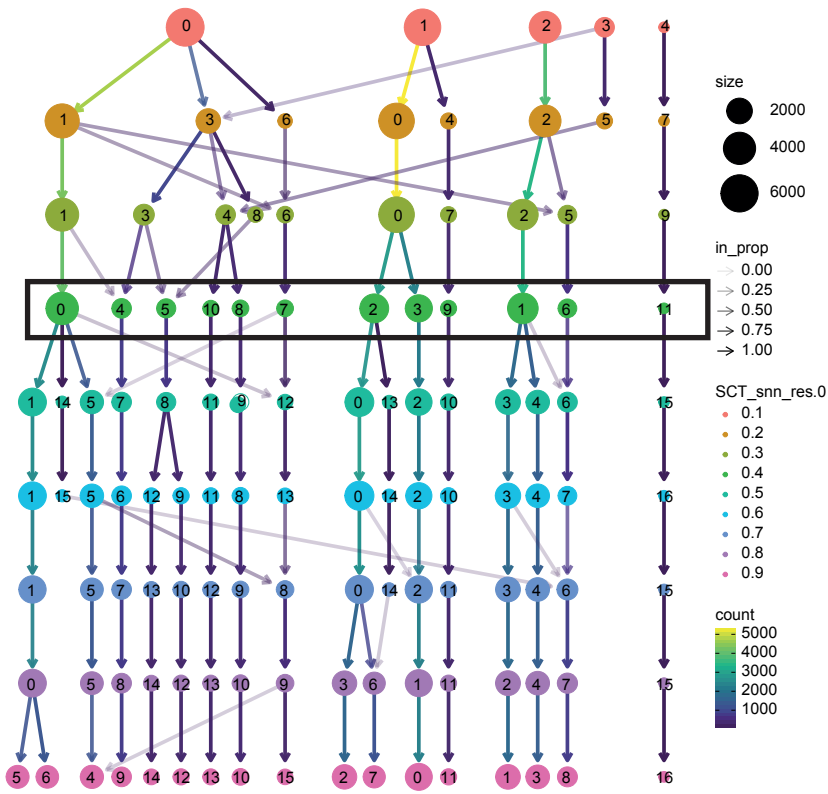

d

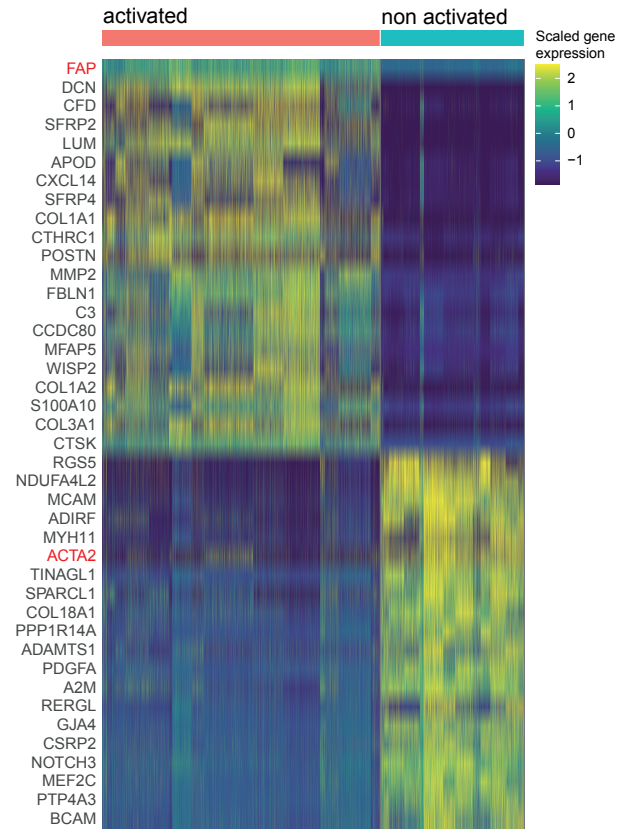

e

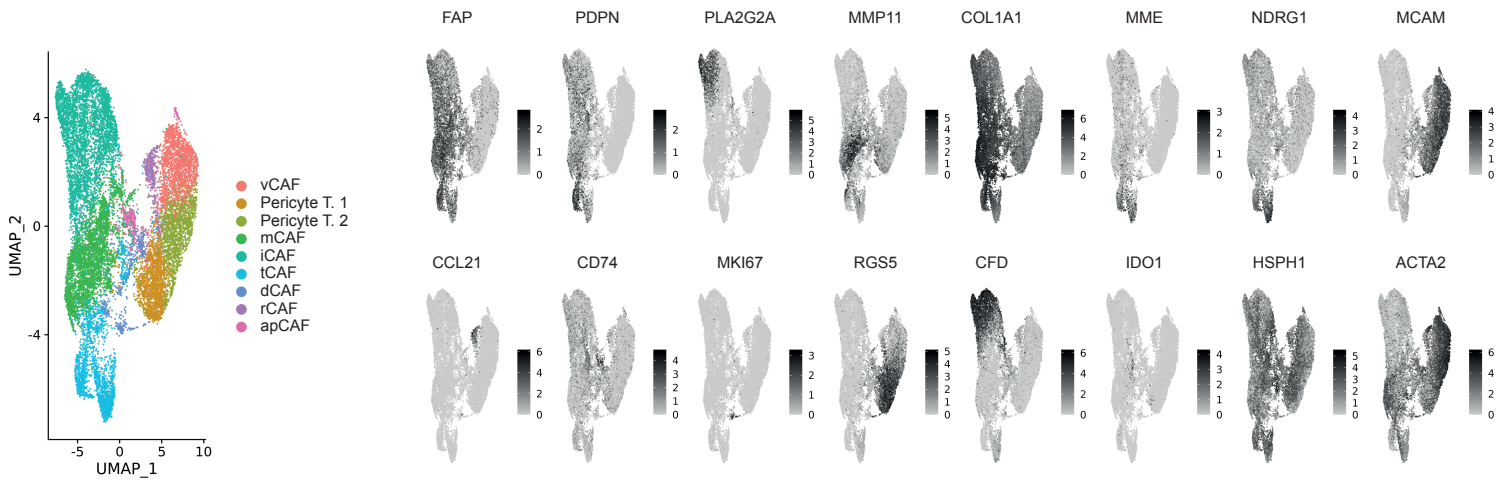

f

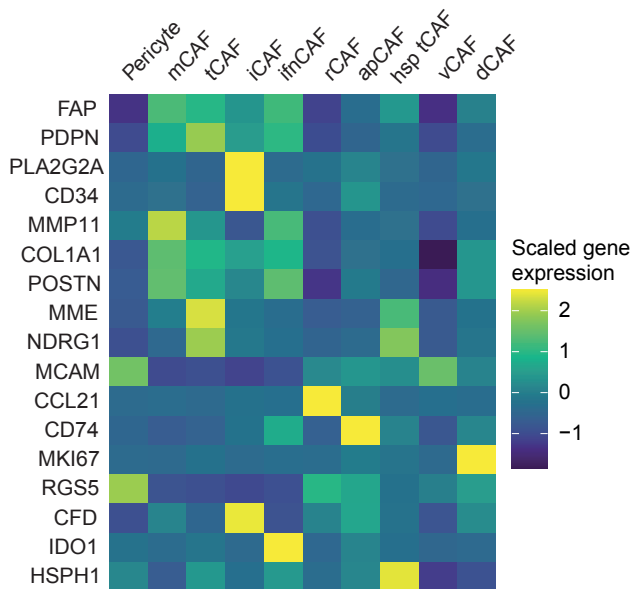

g

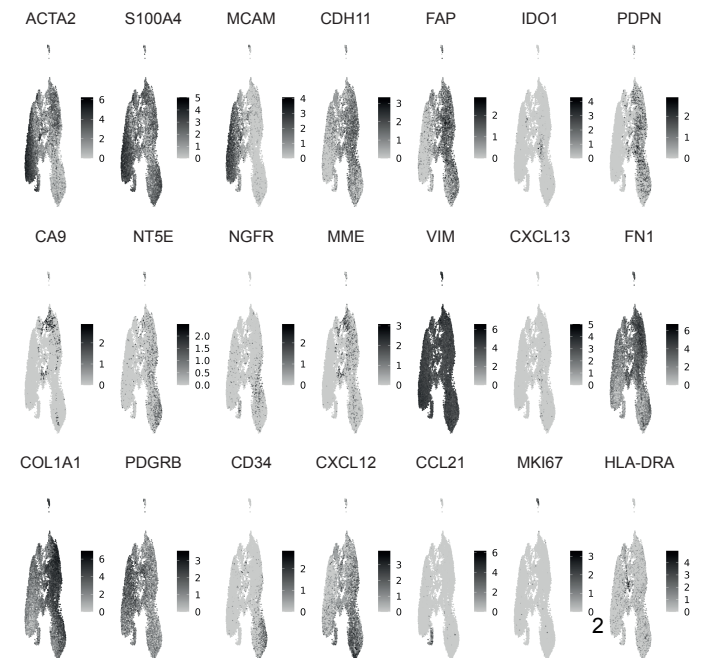

### **Supplementary Figure 1 – scRNA-seq data of breast cancer**

- a) UMAPs of the uncorrected raw data (left two plots) and the batch corrected data (right two plots), coloured by run and sample ID.
- b) Heatmap showing the top 10 differentially expressed genes for each cluster at the resolution of 0.4.
- c) Clustree showing hierarchical clustering for breast cancer fibroblasts.
- d) Heatmap of all cells showing the classification as activated and non-activated and their respective differentially expressed genes.
- e) UMAP of CAF type assignment from raw, uncorrected scRNA-Seq data. The feature plots show expression level of our defined CAF selected marker genes.
- f) Heatmap showing the average marker gene expression of all defined marker genes for clusters detected when clustering all stromal cells using only the subset of defined marker genes.
- g) Feature plot showing expression of all CAF markers selected for IMC as detected in the breast cancer cohort.

a

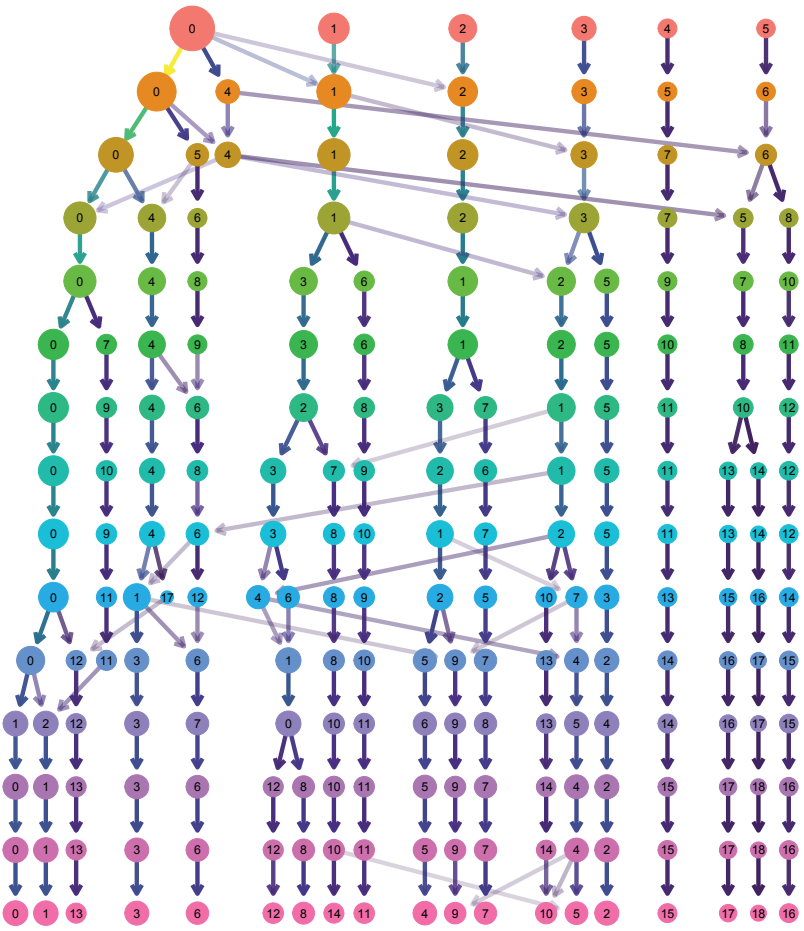

c

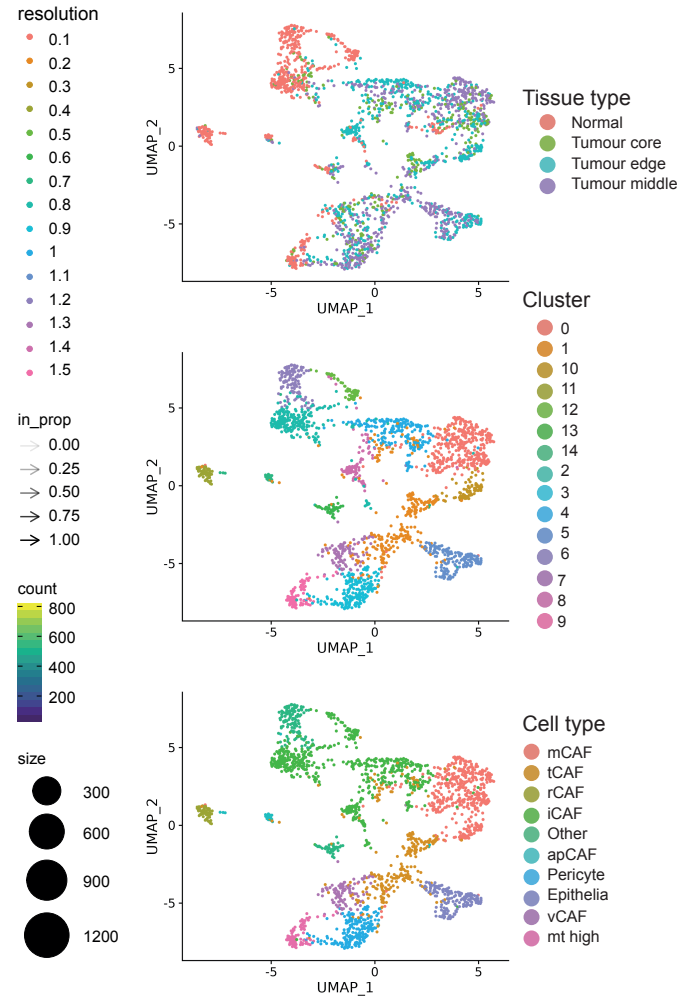

b

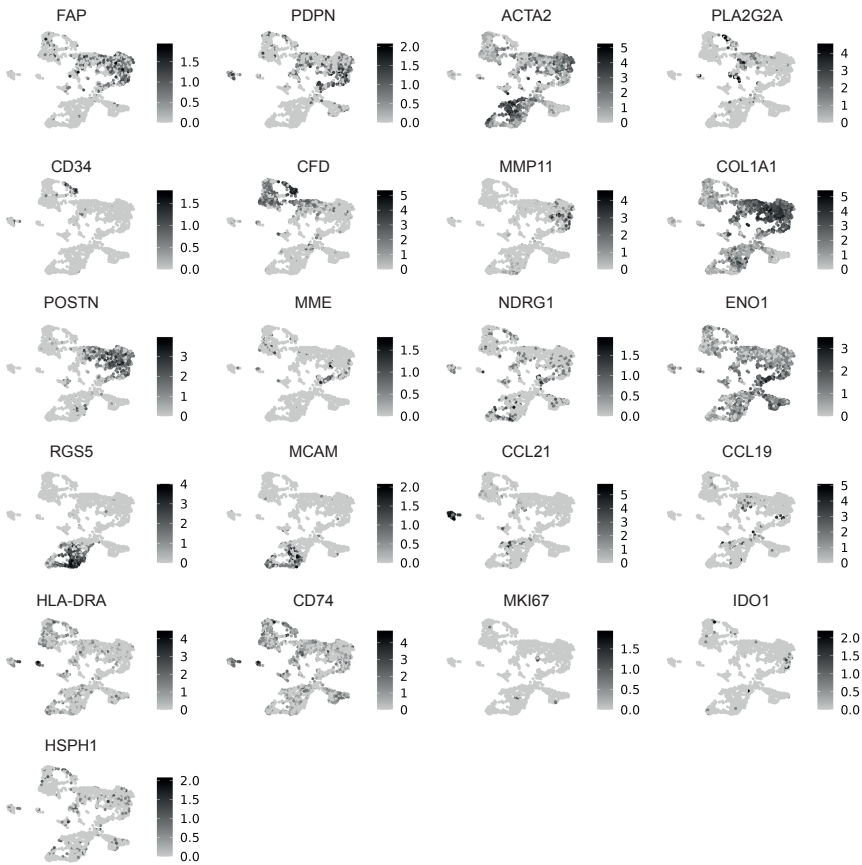

d

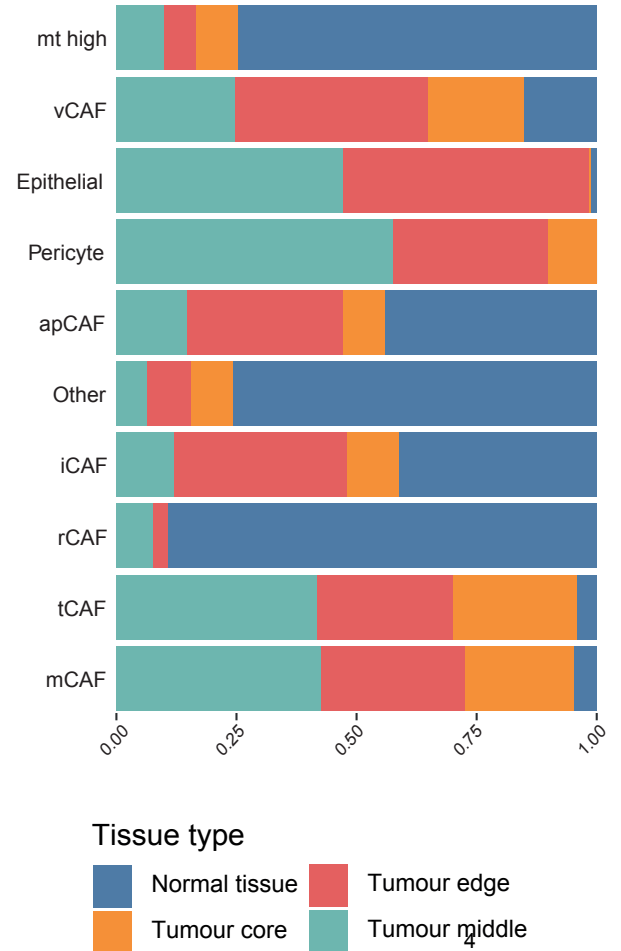

## **Supplementary Figure 2 – Analysis of the lung cancer scRNA-seq data**

- a) Clustree showing the hierarchical clustering of all lung cancer stromal cells.
- b) Feature plot showing the marker expression of all marker genes for all cells in this dataset.
- c) UMAPs coloured by (top to bottom) tissue sites sequenced in the original study (normal tissue, tumour core, tumour edge, tumour middle), clusters obtained at clustering resolution of 0.8, and the final cell type assignments of mCAFs, tCAFs, rCAFs, iCAFs, other, apCAFs, pericytes, epithelial cells, vCAFs, and mitochondrial-high cells (mt high).
- d) Proportions of tissue site distribution of all defined cell types in this dataset.

a

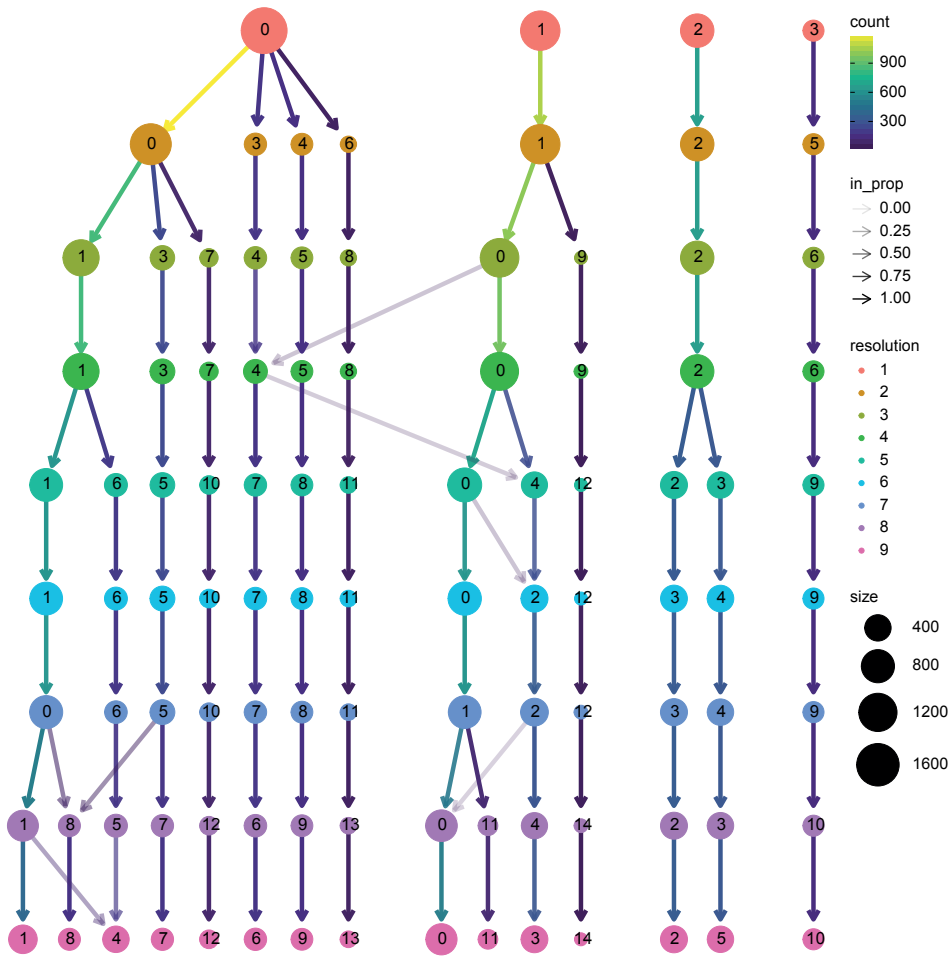

c

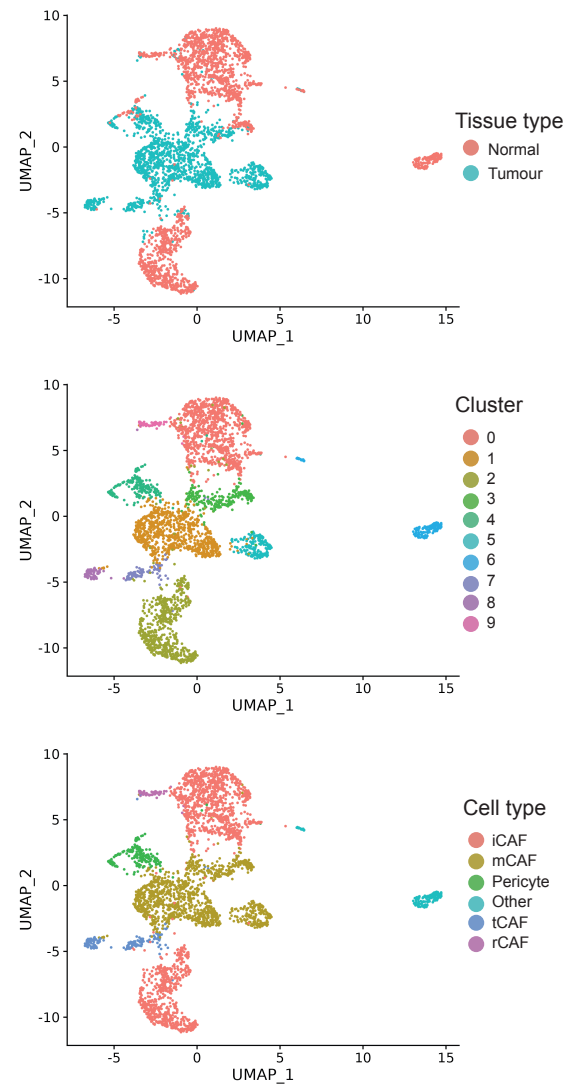

b

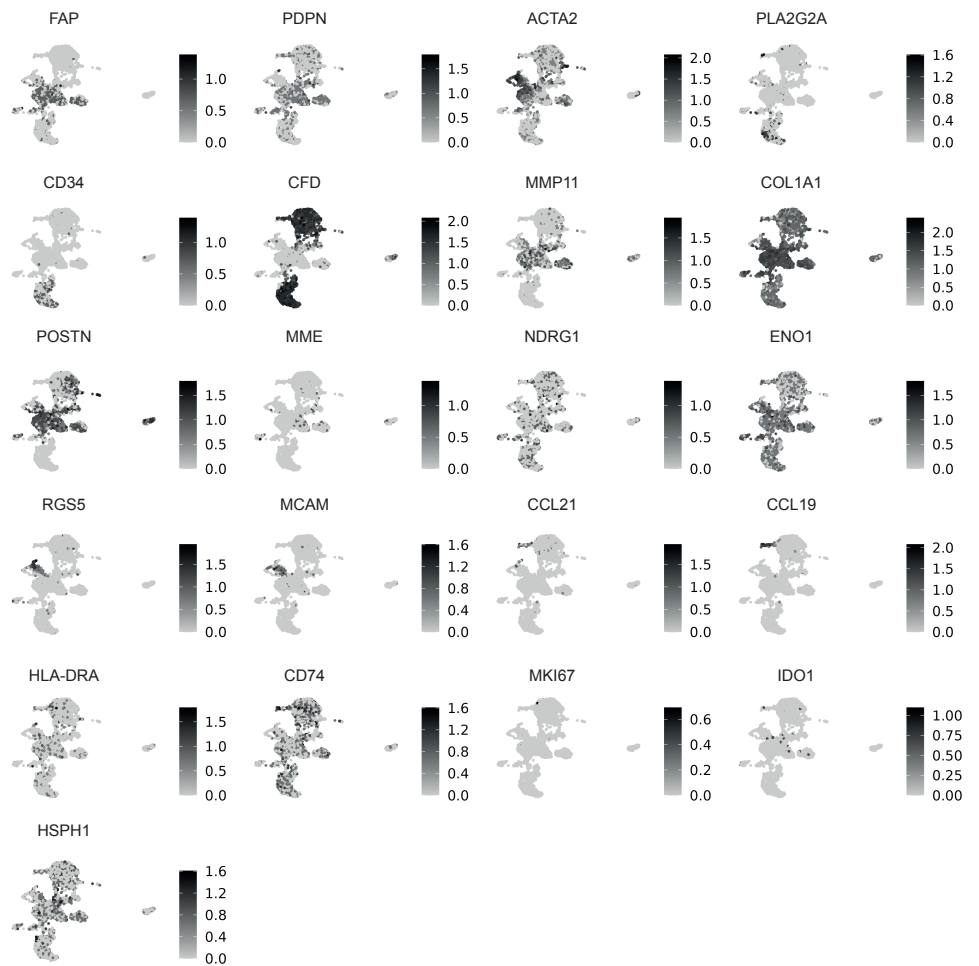

d

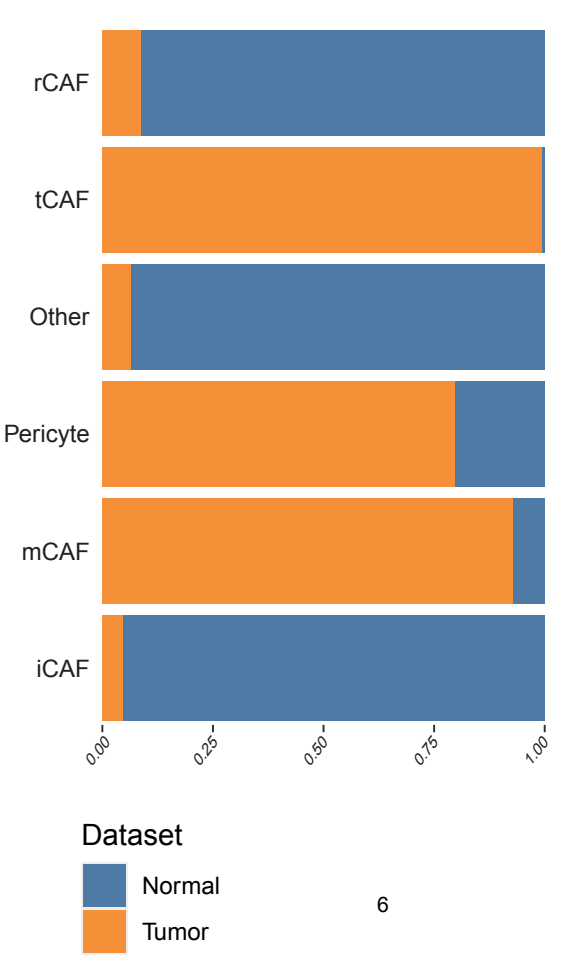

### **Supplementary Figure 3 – Analysis of scRNA-seq data from colon cancer**

- a) Clustree showing the hierarchical clustering of all colon cancer stromal cells.
- b) Feature plot of all colon cancer CAFs showing the expression of defined marker genes.
- c) UMAPs coloured by (top to bottom) tissue sites sequenced in the original study (normal tissue, tumour tissue), clusters obtained at clustering resolution of 0.3, and final cell type assignments of iCAFs, mCAFs, pericytes, other, tCAFs, and rCAFs.
- d) Cell type distribution between tumour and healthy tissue origin for all cell types defined in this dataset.

a

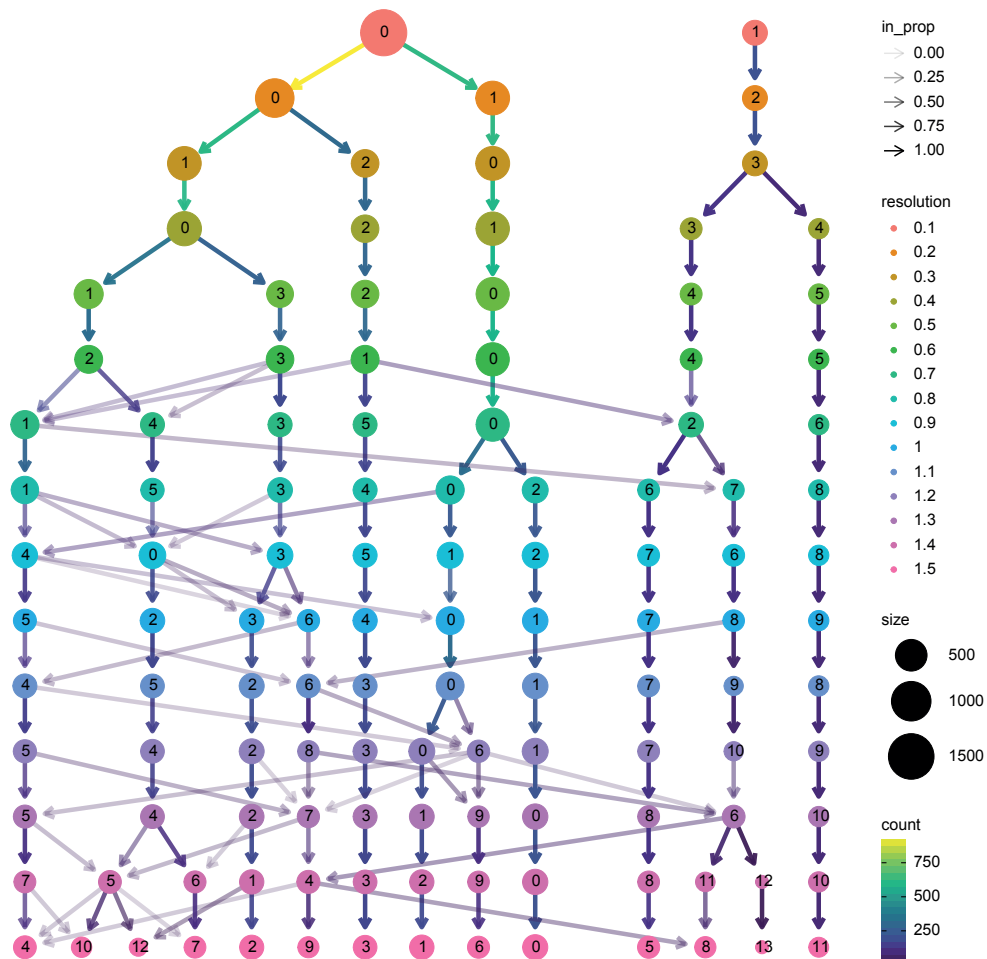

b

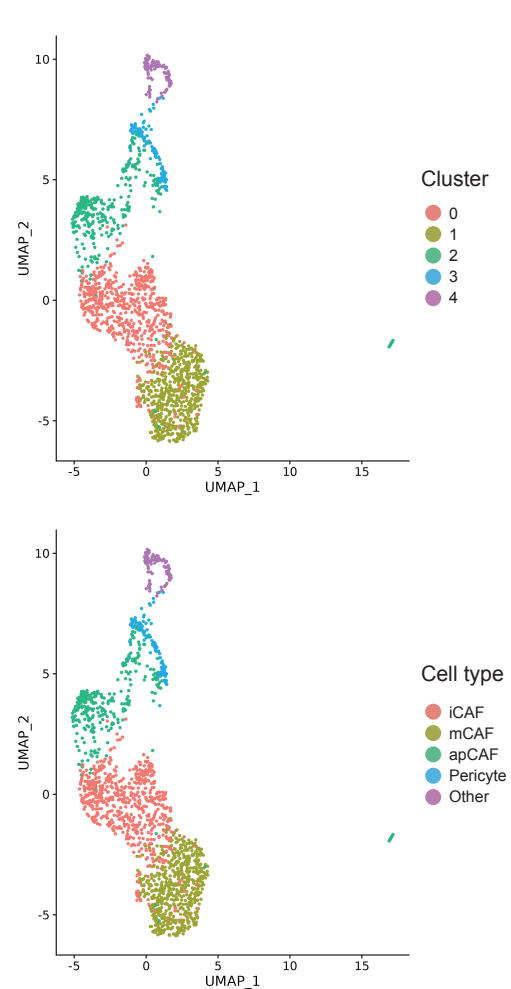

c

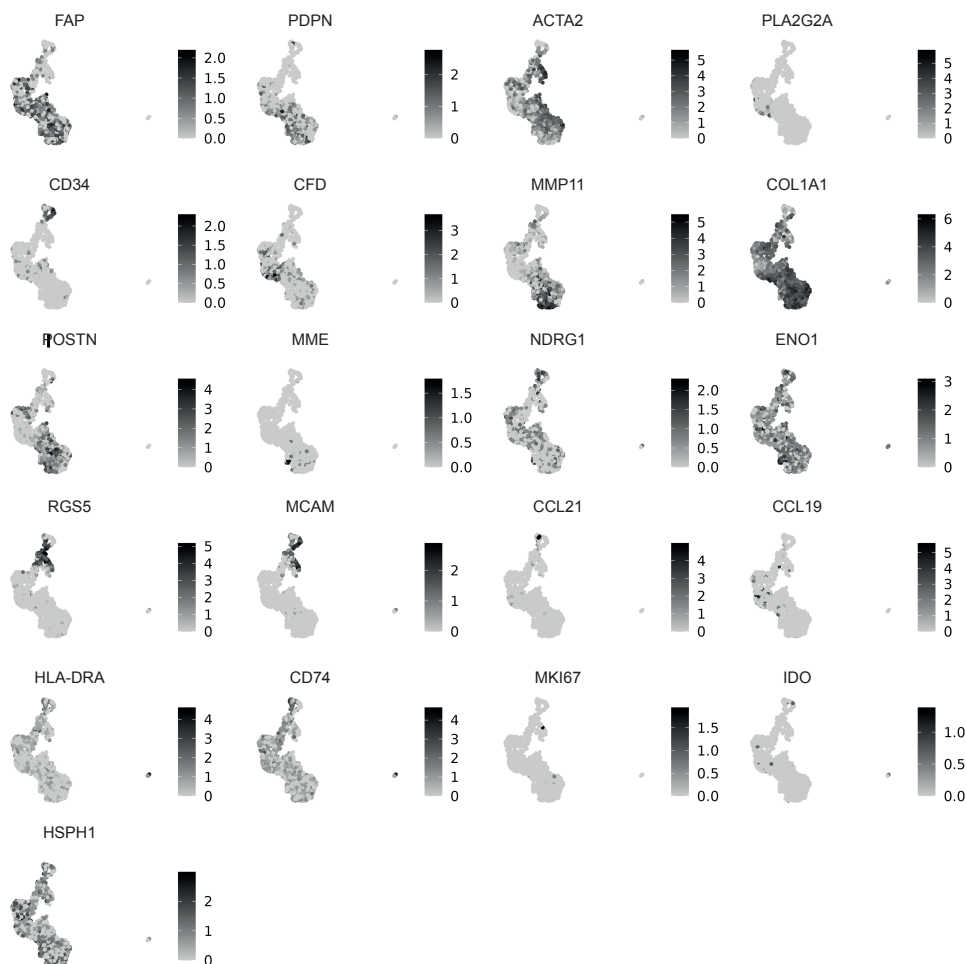



**Supplementary Figure 4 – Individual analysis of the small PDAC dataset.**

- a) Hierarchical clustering tree (using the clustree package) showing the clustering results of the small PDAC dataset at clustering steps.
- b) UMAPs coloured by the chosen clustering resolution of 0.4 and the resulting 5 different clusters as well as the final cluster assignment (iCAFs, mCAFs, apCAFs, pericytes and other).
- c) Feature plot showing the expression of all previously identified marker genes on the UMAP.

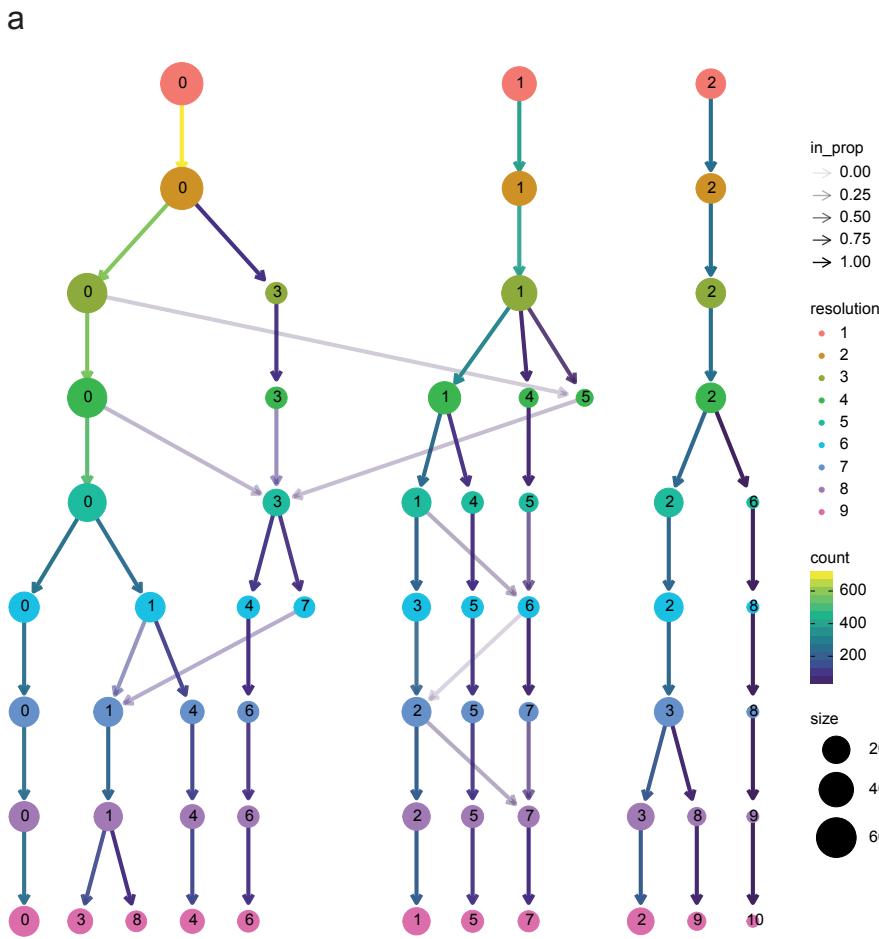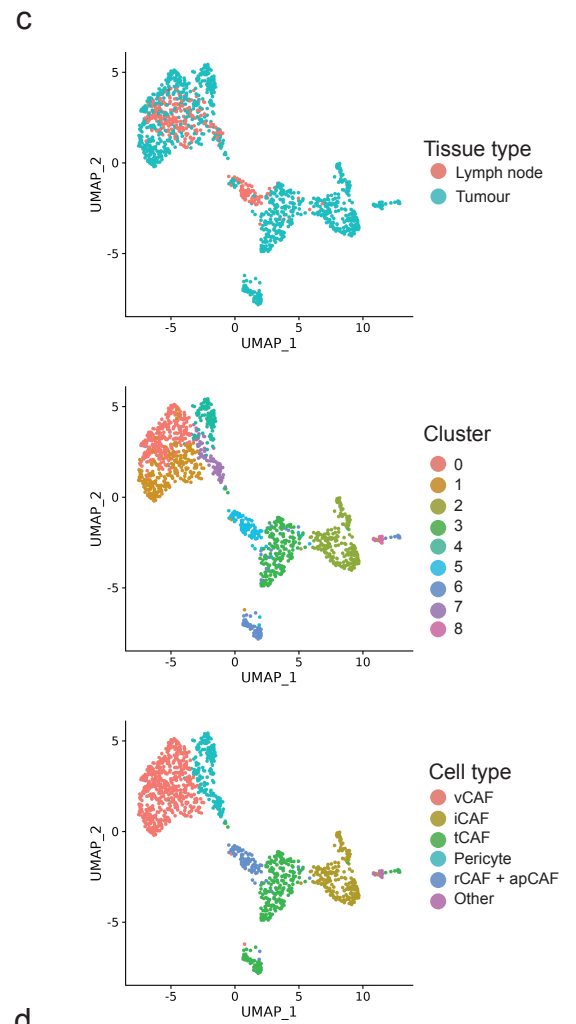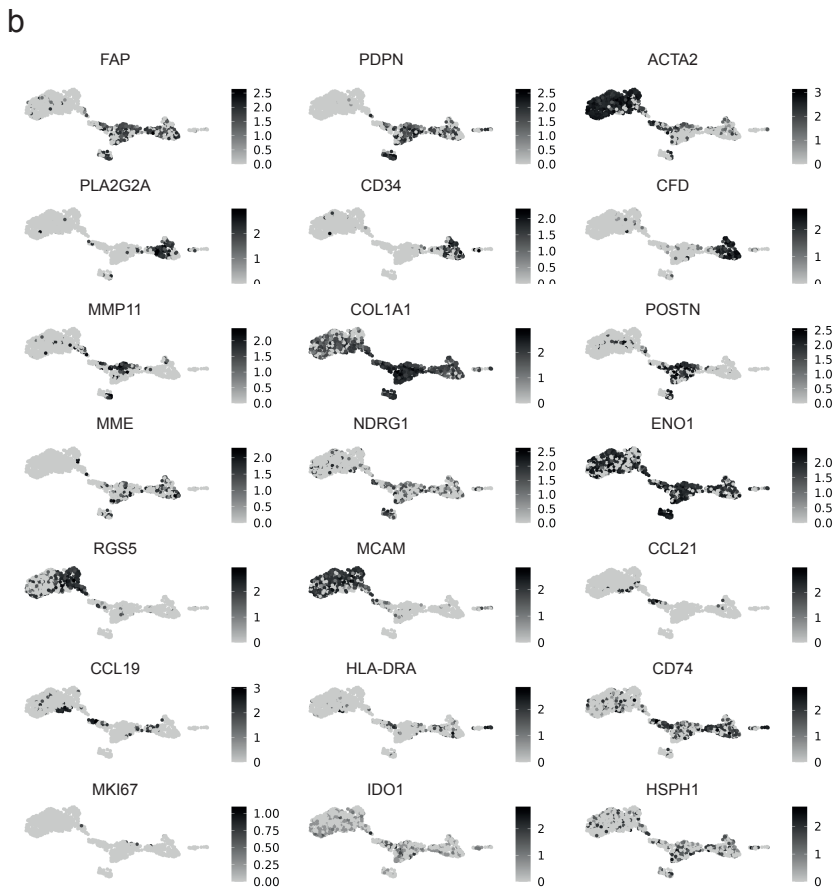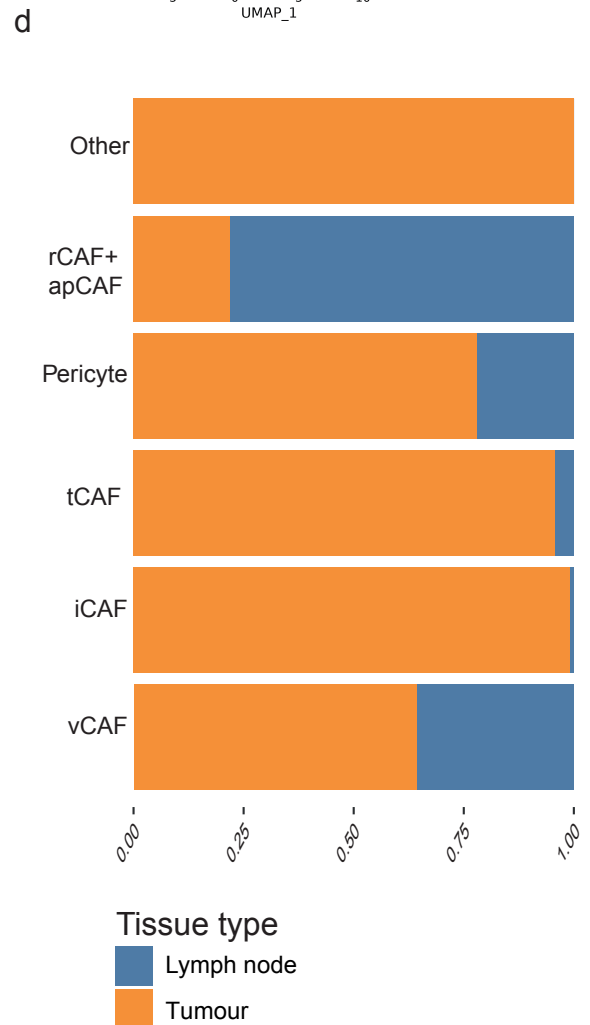

## **Supplementary Figure 5 - Analysis of scRNA-seq data from head and neck squamous cell carcinoma**

- a) Clustree showing clustering hierarchy of HNSCC CAFs. Feature plot showing the marker expression of all marker genes for all cells in this dataset.
- b) Feature plot showing the expression of all previously identified marker genes on the UMAP.
- c) UMAPs coloured by (top to bottom) tissue sites sequenced in the original study (metastatic lymph node, primary tumour tissue), clusters obtained at clustering resolution of 0.6, and the final cell type assignments of vCAFs, iCAFs, tCAFs, pericytes, apCAFs + rCAFs, and other cells.
- d) Cell type distribution between tumour and metastatic lymph node tissue origin for all cell types defined in this dataset.

**a**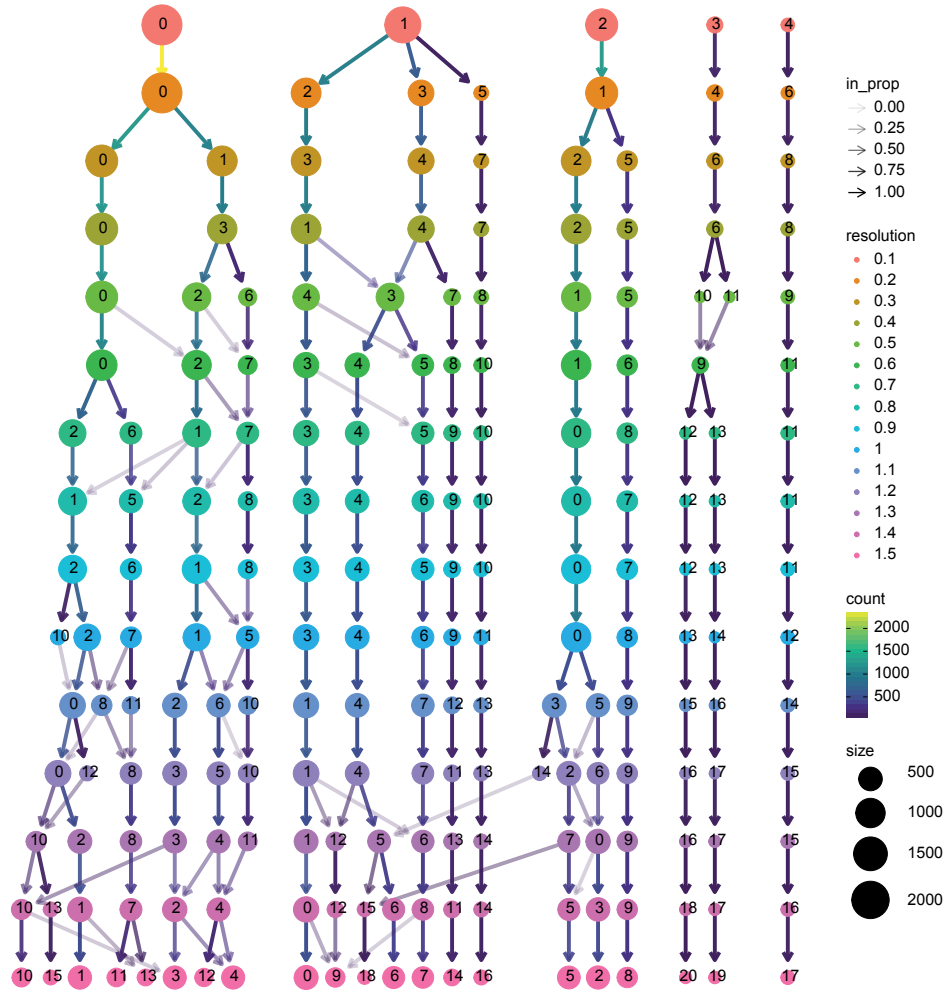**b**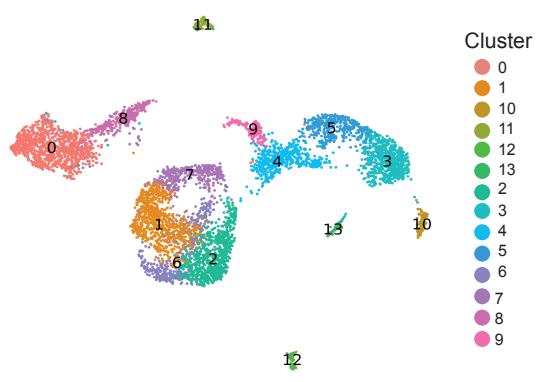**c**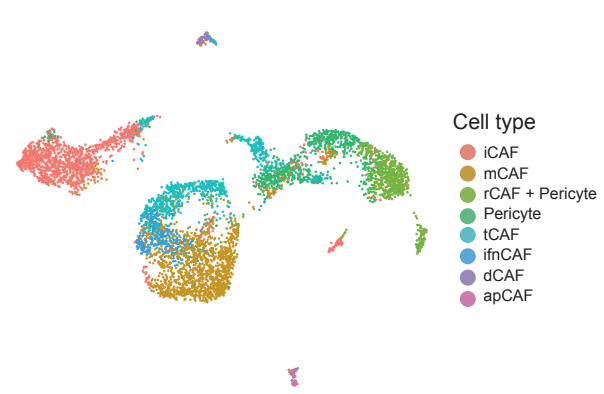**d**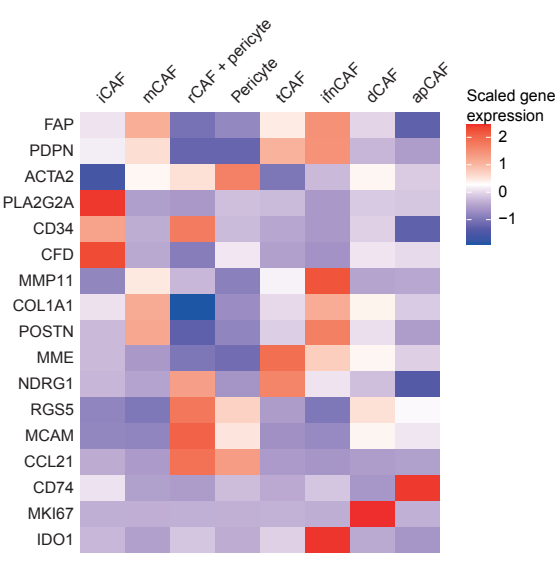**e**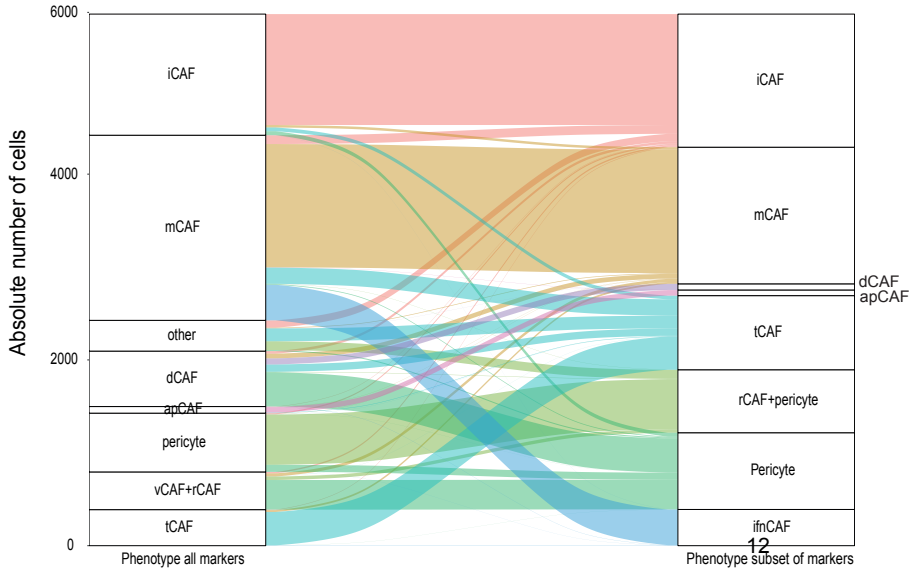

## **Supplementary Figure 6 - Analysis of the integrated scRNA-seq datasets**

- a) Clustree showing the hierarchical clustering results of the integrated dataset.
- b) Clustering of the integrated dataset at 0.7 chosen for the final cell type assignment.
- c) UMAP coloured by CAF types recovered when clustering the integrated dataset using only the subset of defined marker genes.
- d) Heatmap showing the average expression level of defined marker genes for clusters defined after clustering the dataset using only the defined marker genes.
- e) Sankey plot showing the cell affiliations when clustering using (left) all genetic features of the integrated dataset and (right) only the subset of defined marker genes.

a

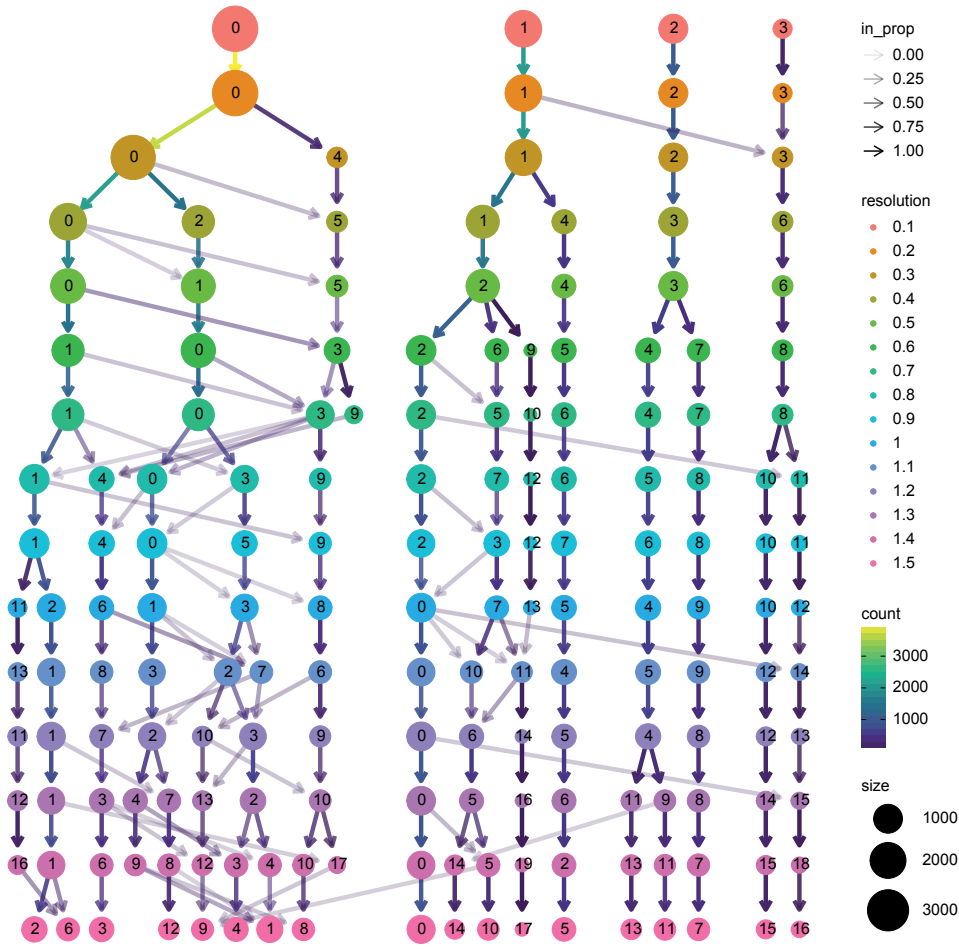

b

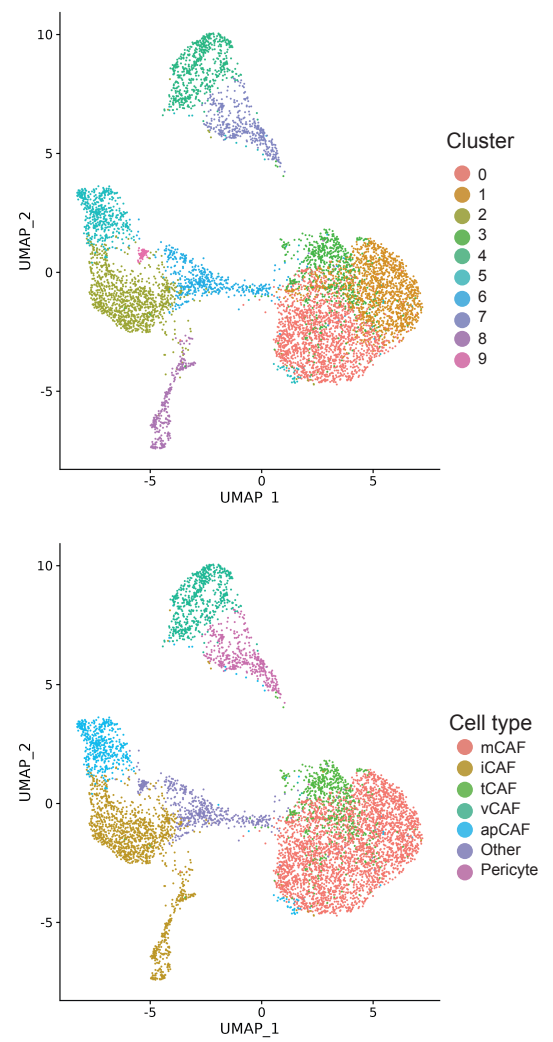

c

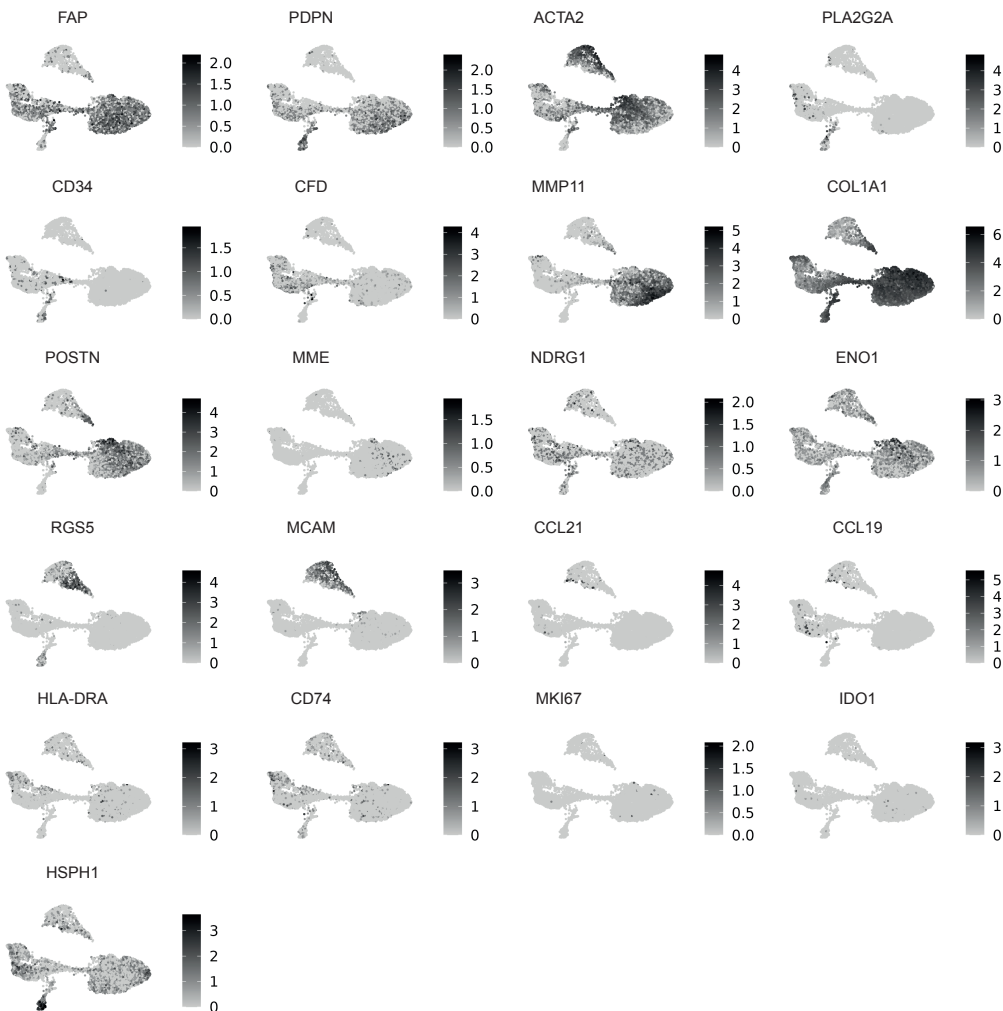

### **Supplementary Figure 7 – Individual analysis of a larger PDAC dataset**

- a) Hierarchical clustering tree (using the clustree package) showing the clustering results of the big PDAC dataset.
- b) UMAPs coloured by the chosen clustering resolution of 0.6 and the resulting 10 different clusters as well as the final cluster assignment.
- c) Feature plot showing the expression of all previously identified marker genes on the UMAP.

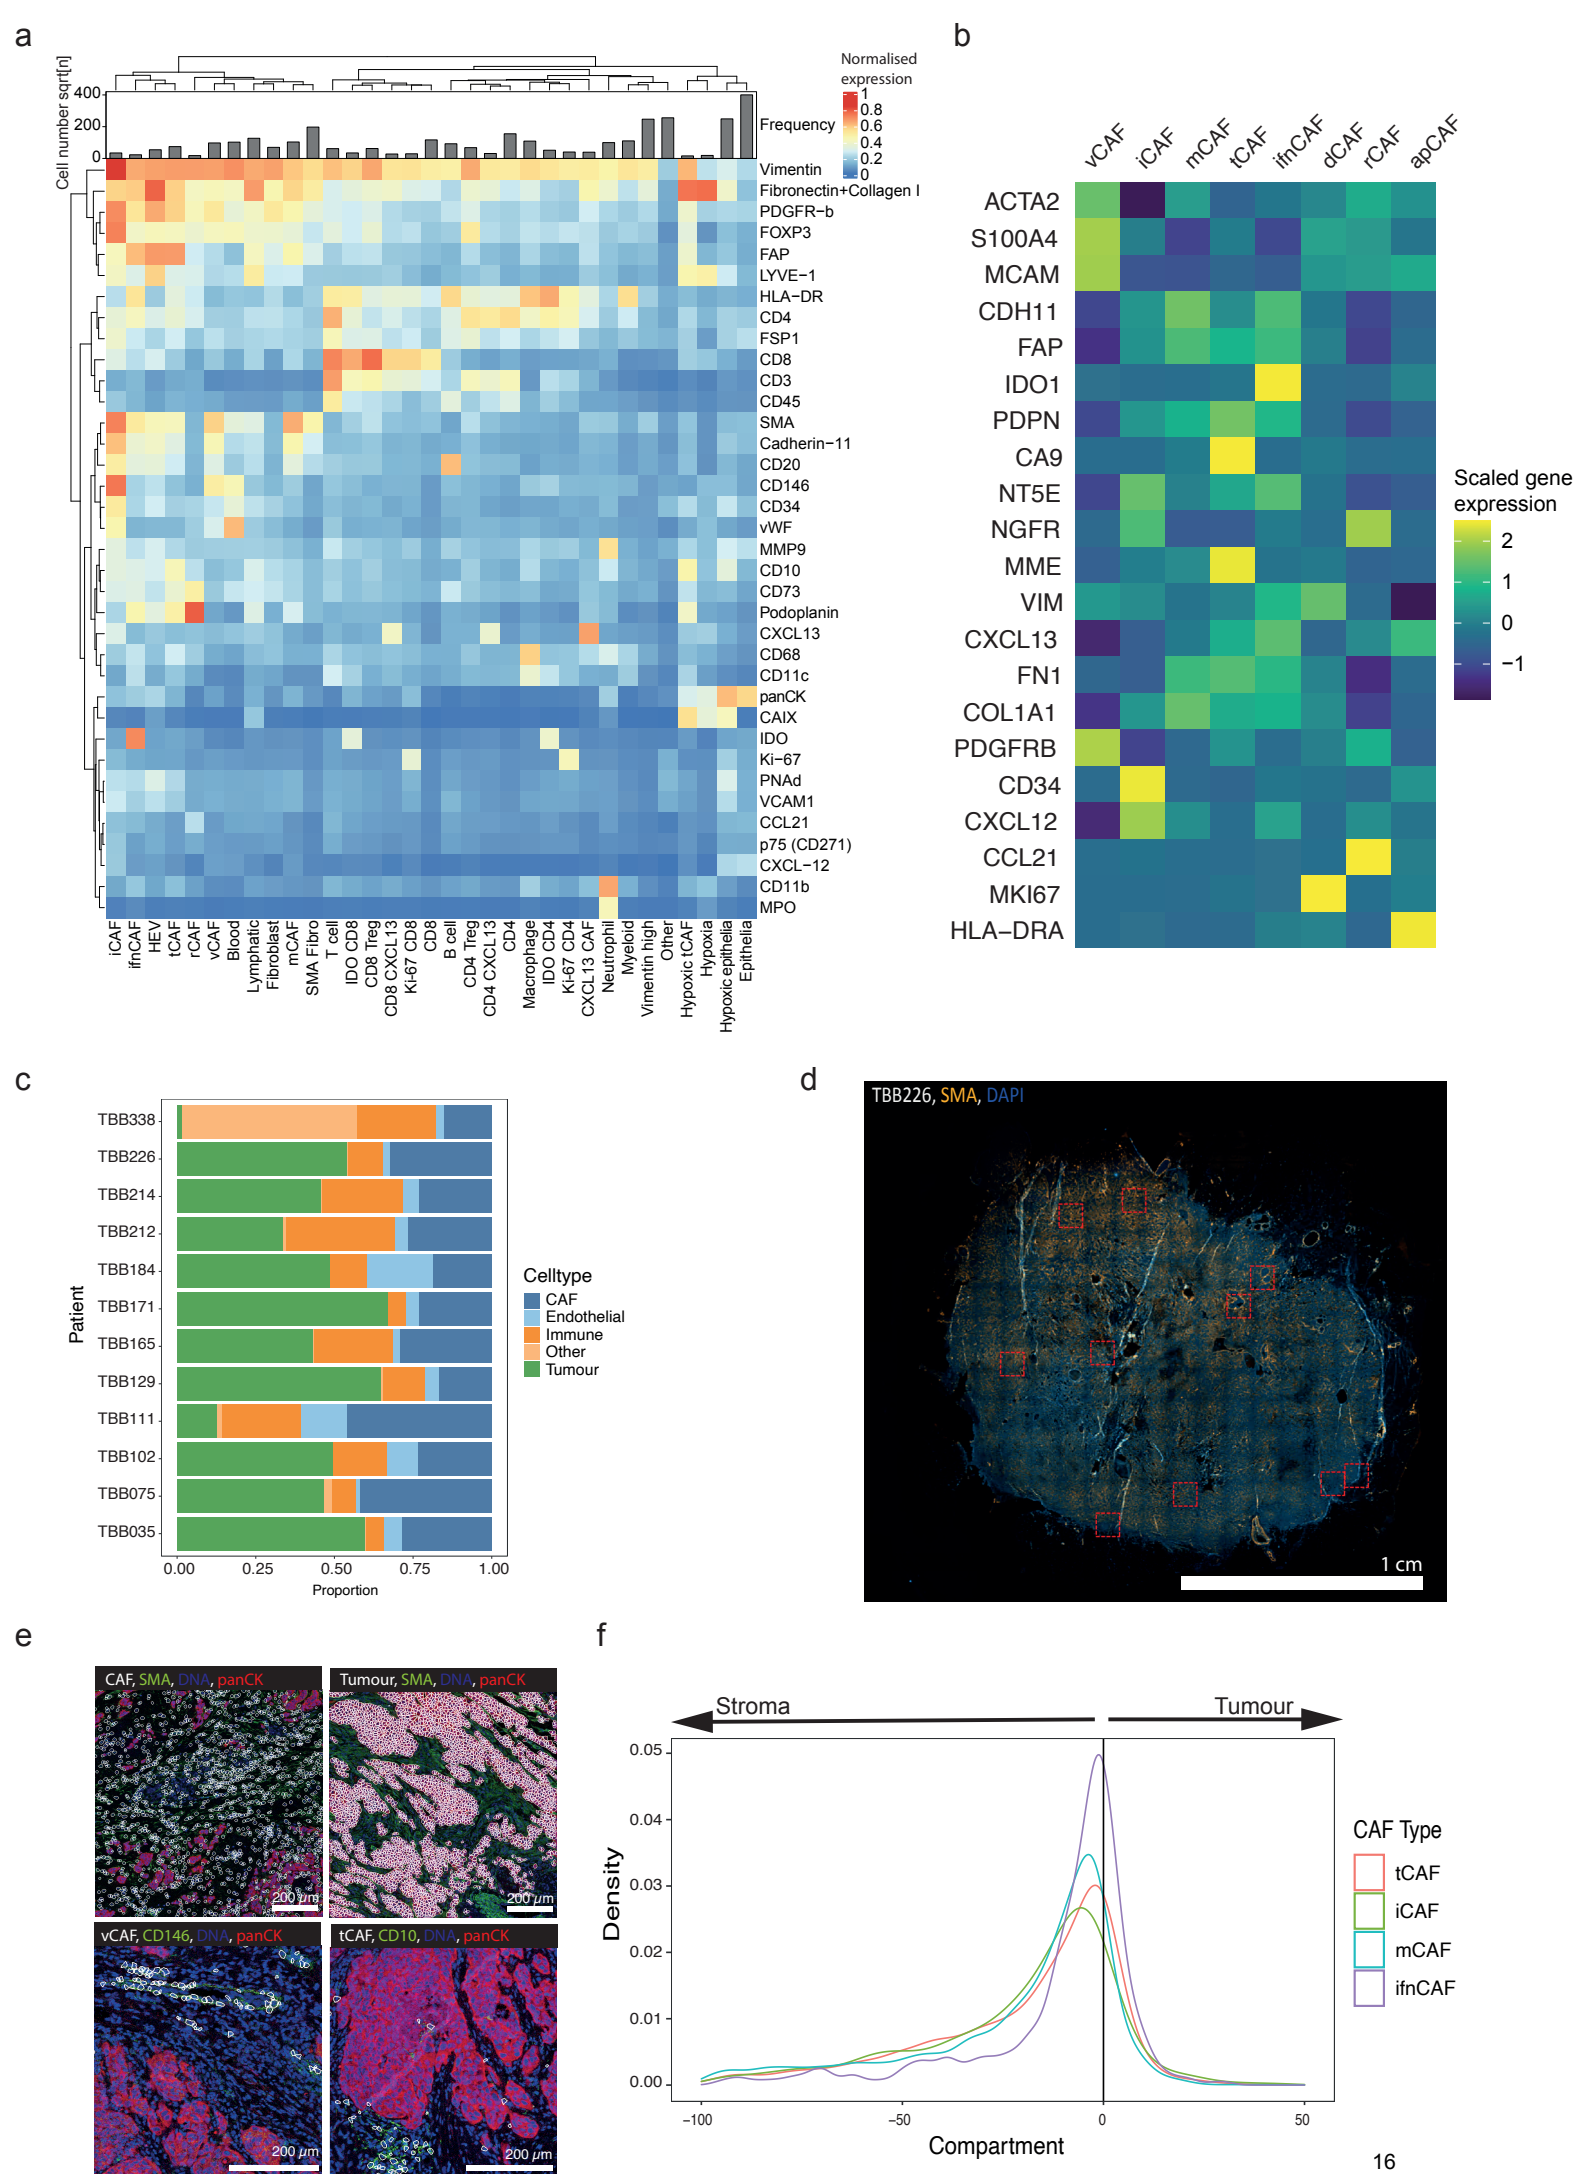



## Supplementary Figure 8 – IMC analysis of matched breast cancer tissue samples

- a) Heatmap showing the average marker expression of all markers assessed in this study for all assigned cell types. Bar chart shows the number of cells per cluster.
- b) Average marker expression per CAF cluster in the breast cancer scRNA-seq data, when clustering based on the genes selected for IMC analysis.
- c) Bar chart showing the proportional distribution of CAFs, endothelial, immune, other cells, and tumour cells per patient as measured with IMC.
- d) Whole slide immunofluorescence image of sample TBB showing the region selection for IMC based on the stroma distribution. All images were acquired once.
- e) Images showing the expression of Iridium, SMA, panCK, CD146 and CD10 for a selection of images together with an overlay of cell masks showing the indicated cell types (all CAFs, tumour cells, vCAFs or tCAFs) in the image. The images showing vCAFs and tCAFs are zoomed-in areas to allow better visualisation of the CAF types in the tissue. Scale bars, 200  $\mu\text{m}$ . All images were acquired once.
- f) Density plots showing the distance of CD34<sup>+</sup> iCAFs, tCAFs, mCAFs, and ifnCAFs to the tumour stroma border (stroma to the left, tumour on the right).

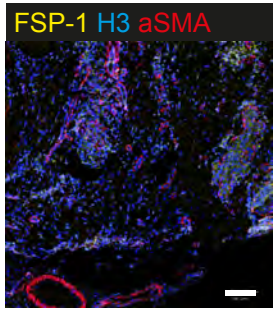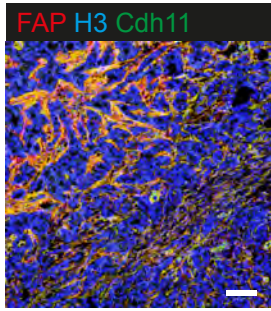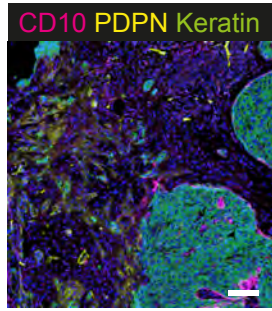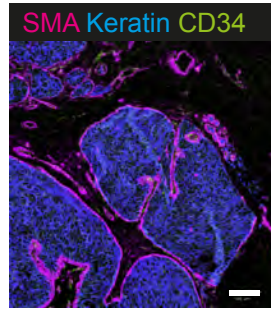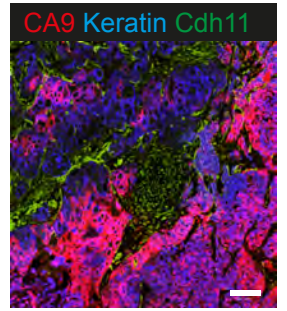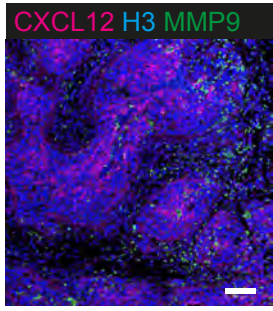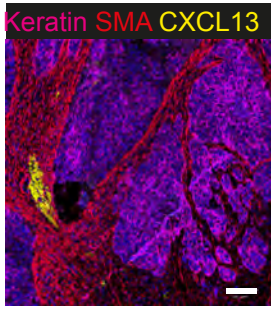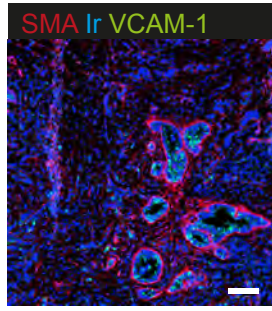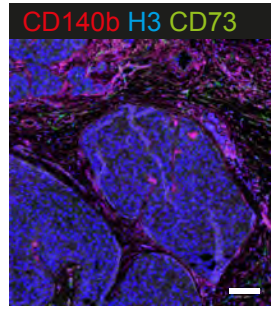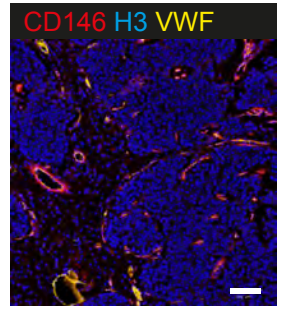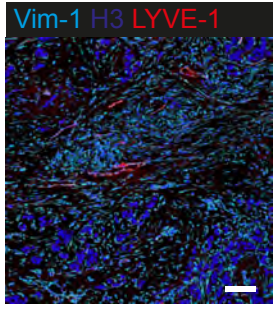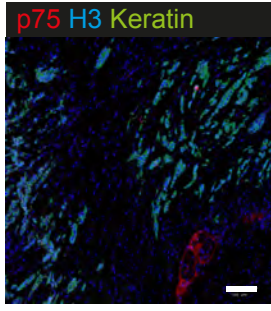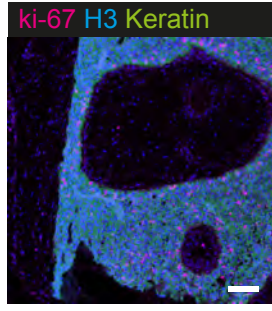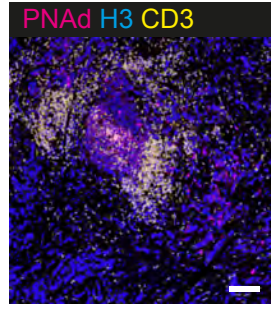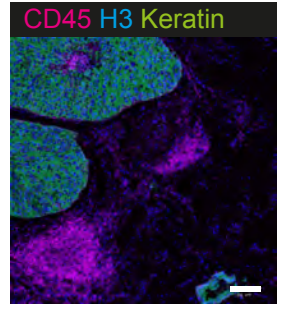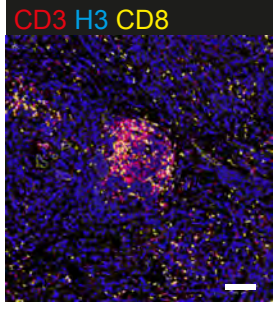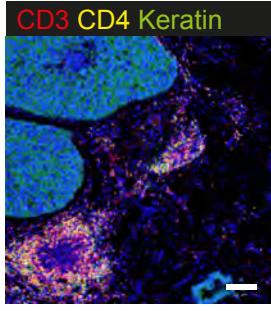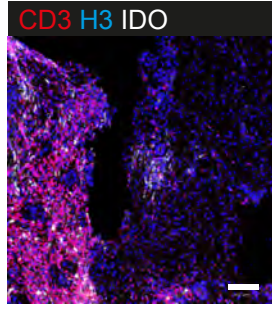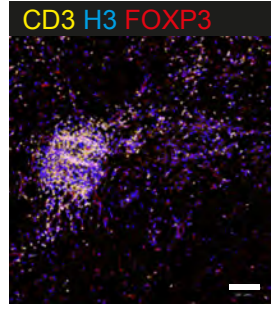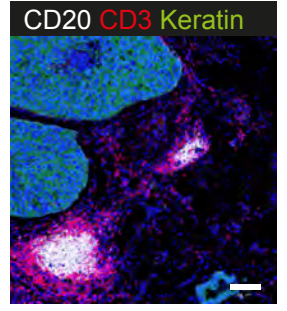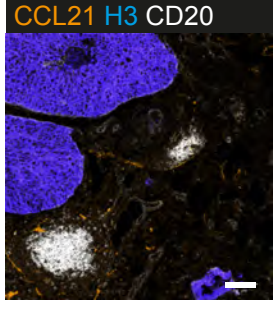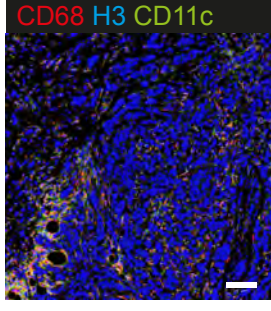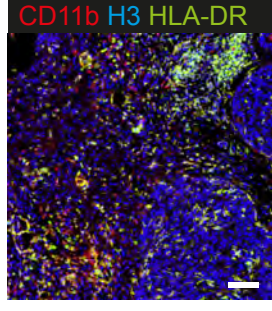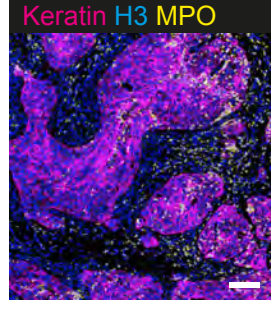

**Supplementary Figure 9 – All measured IMC marker channels shown once**

All markers measured in IMC shown at least once as detected in tissues used in this study. Scale bars, 200  $\mu\text{m}$ . All images were acquired once.

a

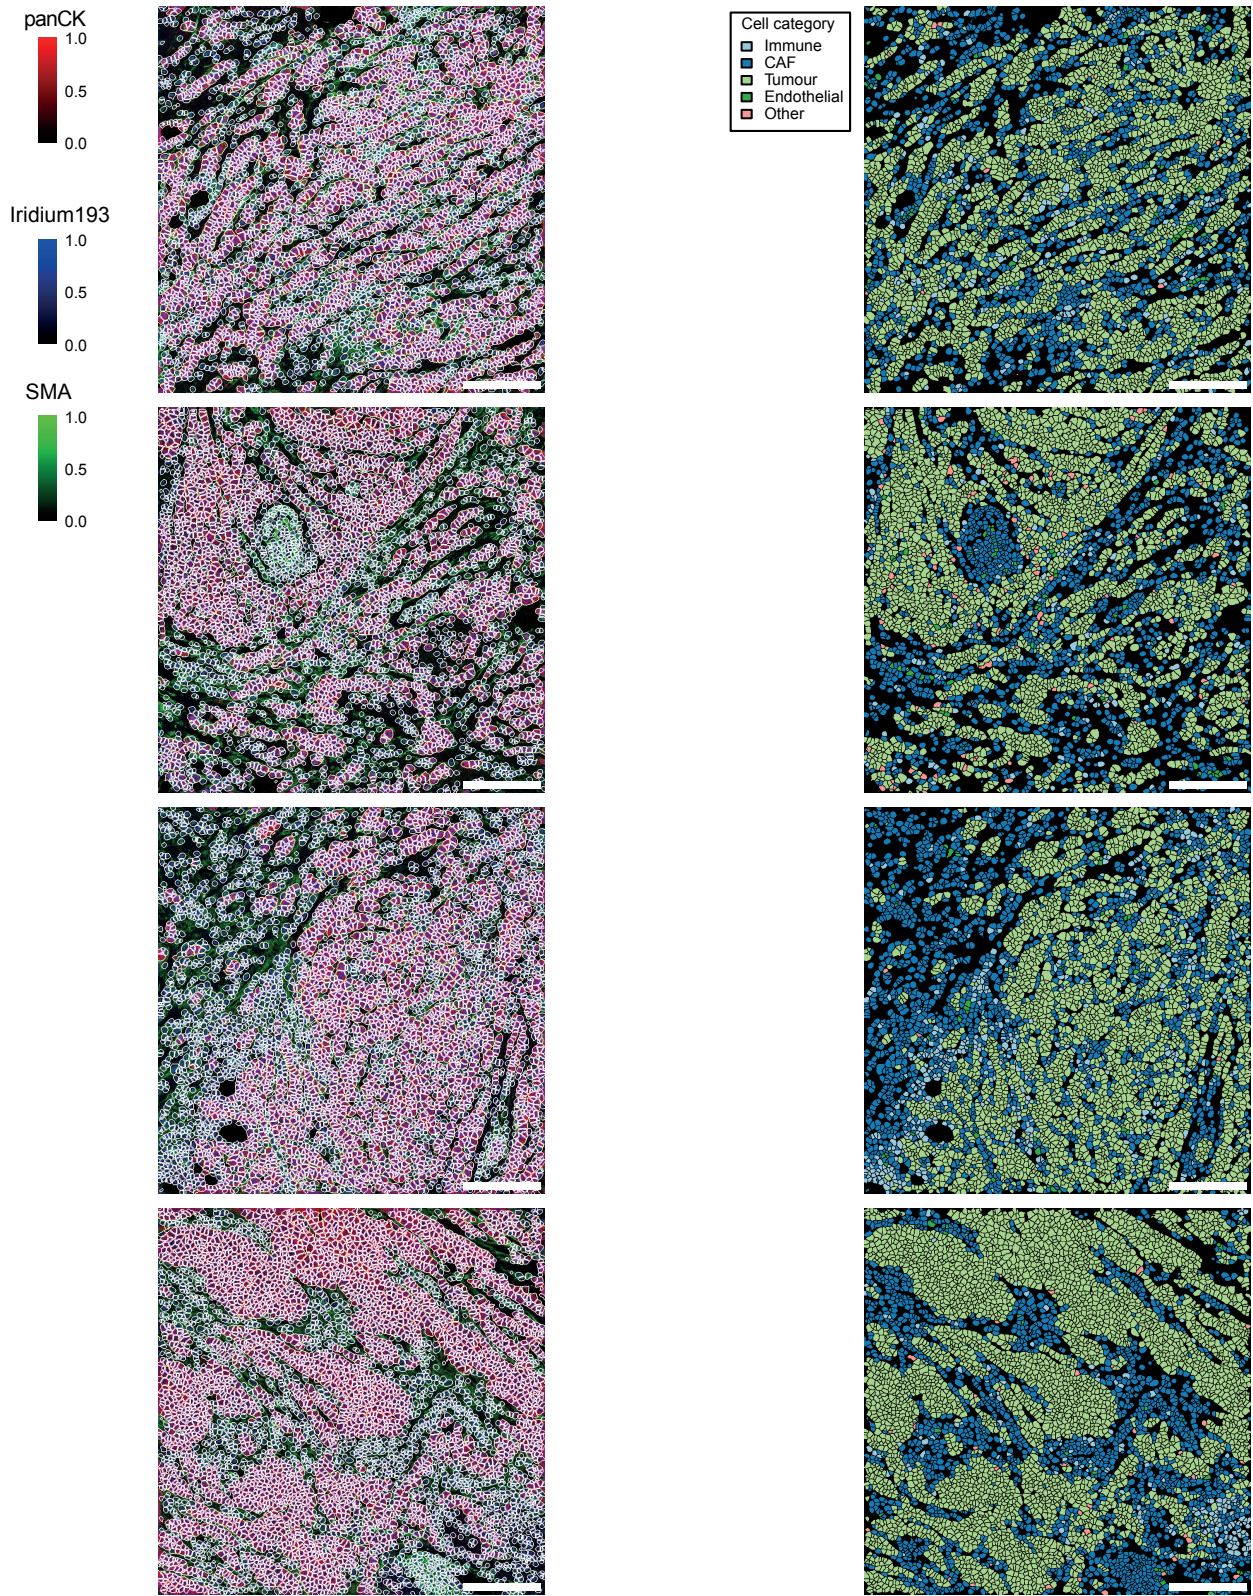

b

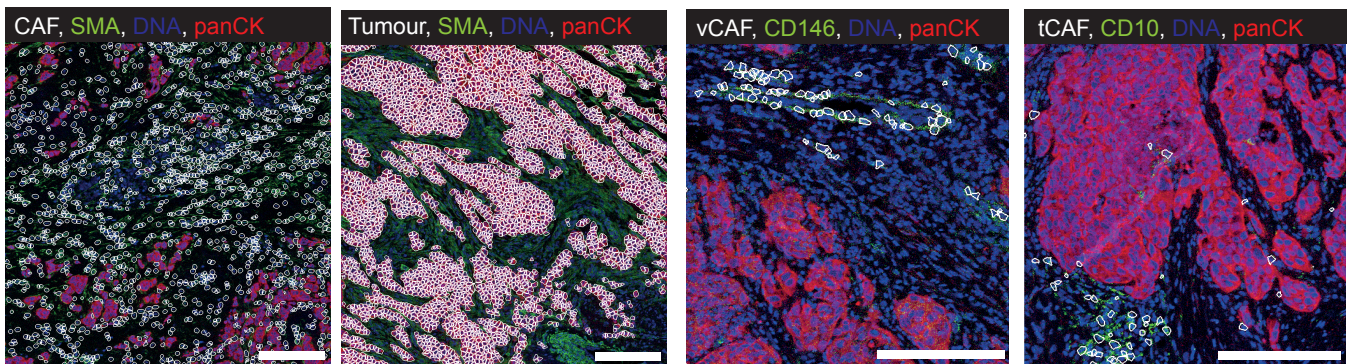

### **Supplementary Figure 10 – IMC single-cell segmentation mask overlays**

- a) Raw pixel images (left) showing pan CK in red, SMA in green, DNA in blue with overlaying cell segmentation masks (cells in white). Pseudo-coloured segmentation masks (right) for all cell categories (tumour, CAF, endothelial, immune, other) defined in our IMC study. Scale bars, 200  $\mu\text{m}$ . All images were acquired once.
- b) Raw pixel images showing expression of the indicated markers, with cell segmentation masks (white) also shown for CAFs, tumour cells, vCAFs and tCAFs with markers showing SMA in green (first two images), CD146 in green (third image) and CD10 in green (fourth image), DNA (Iridium) in blue and panCK in red. Scale bars, 200  $\mu\text{m}$ . All images were acquired once.

| Metal Tag | Target                          | Antibody Clone | Concentration    | Lot              | Provider             | Catalogue Number | RRID            |
|-----------|---------------------------------|----------------|------------------|------------------|----------------------|------------------|-----------------|
| Y89       | Myeloperoxidase                 | Polyclonal     | 4 ug/mL          | 2003045          | Dako                 | A0398            | AB_2335676      |
| In113     | FSP1 / S100A4                   | Polyclonal     | 6 ug/mL          | 3126953          | Millipore            | 136784           | 2               |
| In115     | SMA                             | 1A4            | 2 ug/mL          | 2183900          | E-<br>Bioscience     | 14-9760-82       | AB_2572996      |
| Pr141     | Histone H3                      | D1H2           | 1 ug/mL          | 15               | CST                  | 4499BF           | 7               |
| Nd142     | CD11b                           | SP330          | 5 ug/mL          | GR3258740-1      | Abcam                | ab241408         | AB_2889379      |
| Nd143     | HLA-DR                          | TAL 1B5        | 1 ug/mL          | GR3222279-4      | Abcam                | ab20181          | AB_445401       |
| Nd144     | CD146                           | Polyclonal     | 2 ug/mL          | ECL0319041       | R&D<br>Systems       | AF932            | AB_355721       |
| Nd145     | Cadherin-11                     | 283416         | 5 ug/mL          | VLT0219091       | R&D<br>Systems       | MAB1790          | AB_2076970      |
| Nd146     | fap                             | Polyclonal     | 5 ug/mL          | ZKW0315081       | R&D<br>Systems       | AF3715           | AB_2102369      |
| Sm147     | CD11b                           | M1/70          | 5 ug/mL          | B186484          | Biolegend            | 101202           | AB_312785       |
| Nd148     | VCAM1                           | EPR5047        | 5 ug/mL          | GR3255420-4      | Abcam                | ab215380         | AB_2894839      |
| Sm149     | CD20                            | L26            | 4 ug/mL          | 2059976          | E-<br>Bioscience     | 14-0202-82       | AB_1073434<br>0 |
| Nd150     | CD68                            | KP1            | 4 ug/mL          | 2130291          | E-<br>Bioscience     | 14-0688-82       | AB_1115113<br>9 |
| Eu151     | Indoleamine 2-3-<br>dioxygenase | SP260          | 5 ug/mL          | GR3259345-2      | Abcam                | ab245737         | AB_2894840      |
| Sm152     | CD3                             | Polyclonal     | 6 ug/mL          | GR3229164-6      | Dako                 | A0452            | AB_2335677      |
| Eu153     | Podoplanin                      | NC-08          | 5 ug/mL          | B260834          | Biolegend            | 337002           | AB_1595511      |
| Sm154     | CD11c                           | D3V1E          | 5 ug/mL          | 2                | CST                  | 45581BF          | AB_2799286      |
| Gd155     | Carbonic<br>Anhydrase IX        | Polyclonal     | 4 ug/mL          | VNQ0319011       | R&D<br>Systems       | AF2188           | AB_416562       |
| Gd156     | CD73                            | D7F9A          | 4 ug/mL          | 2                | CST                  | 13160BF          | AB_2716625      |
| Gd158     | MMP9                            | D6O3H          | 5 ug/mL          | 4                | CST                  | 13667BF          | AB_2798289      |
| Tb159     | p75 / CD271                     | Polyclonal     | 10 ug/mL         | ANT007AN07<br>02 | alomone<br>labs      | ANT-007          | AB_2039968      |
| Dy161     | CD10                            | E5P7S          | 5 ug/mL          | 2                | CST                  | 65534            | AB_2894842      |
| Dy162     | Vimentin                        | EPR3776        | 1 ug/mL          | GR286525-2       | Abcam                | ab193555         | AB_2814713      |
| Dy163     | FOXP3                           | 236A/E7        | 5 ug/mL          | 2129676          | E-<br>Bioscience     | 14-4777-82       | AB_467556       |
| Dy164     | CXCL13                          | Polyclonal     | 4 ug/mL          | BAS0317101       | R&D<br>Systems       | AF801            | AB_355613       |
| Ho165     | PNAd                            | MECA-79        | 4 ug/mL          | B257139          | Biolegend            | 120802           | AB_493555       |
| Er166     | CD8a                            | C8/144B        | 4 ug/mL          | 2132595          | E-<br>Bioscience     | 14-0085-82       | AB_1115024<br>0 |
| Er167     | Fibronectin                     | 10/Fibronectin | 3 ug/mL          | 6251888          | Bection<br>Dickinson | 610078           | AB_397486       |
| Er167     | Collagen I                      | Polyclonal     | 4 ug/mL          | GR3253239-3      | Abcam                | ab34710          | AB_731684       |
| Er168     | LYVE-1                          | Polyclonal     | 7 ug/mL          | KPY0119052       | R&D<br>Systems       | AF2089           | AB_355144       |
| Tm169     | CD140b                          | Y92            | 6 ug/mL          | GR296584-4       | Abcam                | ab215978         | AB_2894841      |
| Er170     | CD34                            | EP373Y         | 10 ug/mL         | GR3271518-1      | Abcam                | ab198395         | AB_2889381      |
| Yb171     | CD4                             | Polyclonal     | 5 ug/mL          | YS0718031        | R&D<br>Systems       | AF-379-NA        | AB_354469       |
| Yb172     | vWF                             | poly vwf       | 4 ug/mL          | 3322998          | Millipore            | AB7356           | AB_92216        |
| Yb172     | CD31                            | EPR3094        | 4 ug/mL          | GR3229164-6      | Abcam                | ab207090         | AB_2889382      |
| Yb173     | CXCL12 / SDF-1                  | 79018          | 5 ug/mL          | JOJ0519031       | R&D<br>Systems       | MAB350-100       | AB_2088149      |
| Yb174     | CCL21 / 6Ckine                  | Polyclonal     | 6 ug/mL          | AYJ218071        | R&D<br>Systems       | AF366            | AB_355327       |
| Lu175     | Keratin Epithelial              | AE3            | 2 ug/mL          | 3255457          | Millipore            | MAB1611          | AB_2134409      |
| Lu175     | pan Cytokeratin                 | AE1            | 2 ug/mL          | 3252910          | Millipore            | MAB1612          | AB_2132794      |
| Pt194     | Ki-67                           | B56            | 5 ug/mL          | 8116751          | Bection<br>Dickinson | 556003           | AB_396287       |
| Bi209     | CD45                            | 2B11           | 3 ug/mL          | 2003422          | E-<br>Bioscience     | 14-9457-82       | AB_1106369<br>6 |
| AF 555    | Goat anti-mouse<br>(H+L)        | Polyclonal     | 1 : 500 dilution | 2090527          | Sigma<br>Aldrich     | A21422           | AB_2535844      |

**Supplementary Table 1 – Antibody panel and Research Resource Identifiers (RRID) validation**

Table showing antibody panel, metal tags, antibody clone information and RRID validation information.
